# Supplementary material for: Effects of acupuncture at acupoints with lower versus higher pain threshold for knee osteoarthritis: a multicenter randomized controlled trial
Source: Springer Nature journal article supplement (doi:10.1186/s13020-022-00626-3), 2022-06-08
Supplement: MOESM2 [file 23140588]

Table S1. Co-interventions used among treatment groups.

| Co-interventions, n(%)               | LPT group (n=222) | HPT group (n=222) | WL group (n=222) | All (n=666) |
|--------------------------------------|-------------------|-------------------|------------------|-------------|
| <b>Medication use during study</b>   |                   |                   |                  |             |
| NSAIDs                               | 5 (2.25)          | 3 (1.35)          | 5 (2.25)         | 13 (1.95)   |
| Glucosamine                          | 52 (23.42)        | 57 (25.68)        | 55 (24.77)       | 164 (24.62) |
| Diacerein                            | 1 (0.45)          | 3 (1.35)          | 2 (0.9)          | 6 (0.9)     |
| Vitamin D                            | 4(1.8)            | 5(2.25)           | 6(2.7)           | 15(2.25)    |
| Alendronate                          | 2 (0.9)           | 0 (0)             | 0 (0)            | 2 (0.3)     |
| Tizanidine hydrochloride             | 1 (0.45)          | 0 (0)             | 0 (0)            | 1 (0.15)    |
| Sodium hyaluronate                   | 1 (0.45)          | 0 (0)             | 0 (0)            | 1 (0.15)    |
| <b>TCM use during study</b>          |                   |                   |                  |             |
| Electromagnetic spectrum irradiation | 12 (5.41)         | 7 (3.15)          | 8 (3.6)          | 27 (4.05)   |
| Moxibustion                          | 3 (1.35)          | 2 (0.9)           | 8 (3.6)          | 13 (1.95)   |
| Massage                              | 5 (2.25)          | 2 (0.9)           | 10 (4.5)         | 17 (2.55)   |
| Medicinal liquor                     | 8 (3.6)           | 6 (2.7)           | 6 (2.7)          | 20 (3)      |
| Cupping                              | 2 (0.9)           | 0 (0)             | 2 (0.9)          | 4 (0.6)     |

NSAIDs: nonsteroidal anti-inflammatory drugs; TCM: Traditional Chinese Medicine

LPT: lower pain threshold; HPT: higher pain threshold; WL: waiting-list.
